# Supplementary material
Source: bioRxiv or medRxiv preprint supplement (https://www.biorxiv.org/highwire/filestream/12284/field_highwire_adjunct_files/2/039578-3.pdf)
Supplement: Supplementary file [file 039578-3.pdf]

# Cryopreservation of human mucosal immune cells: statistics

## Contents

|                                                                                           |           |
|-------------------------------------------------------------------------------------------|-----------|
| <b>Validation of novel cryopreservation medium</b>                                        | <b>2</b>  |
| Repeated measures ANOVAs with Tukey post-test (parametric, paired) . . . . .              | 3         |
| Correlations . . . . .                                                                    | 3         |
| <b>Comparison with published cryopreservation methods</b>                                 | <b>4</b>  |
| Comparison with published methods: Viability and recovery . . . . .                       | 4         |
| Comparison with published methods: Repeated measures ANOVA with Tukey post-test . . . . . | 5         |
| <b>Optimal processing</b>                                                                 | <b>7</b>  |
| Which steps matter? . . . . .                                                             | 7         |
| HANC rescue: viability, recovery, and effect sizes . . . . .                              | 9         |
| <b>Cryopreservation of endocervical cytobrushes</b>                                       | <b>13</b> |
| <b>Cryopreservation of whole cytobrushes</b>                                              | <b>13</b> |
| <b>Cryopreservation of colorectal immune cells</b>                                        | <b>15</b> |

# Validation of novel cryopreservation medium

Table 1: Relative viability

| CellType | Condition | Mean  | 95% CI         | n  |
|----------|-----------|-------|----------------|----|
| CD3      | DT        | 78.87 | [73.88, 83.87] | 10 |
| CD3      | Mix       | 84.20 | [79.41, 89]    | 10 |
| CD3      | 10D       | 72.82 | [66.53, 79.11] | 10 |
| CD14     | DT        | 82.41 | [77.98, 86.85] | 10 |
| CD14     | Mix       | 77.23 | [69.81, 84.66] | 10 |
| CD14     | 10D       | 79.10 | [71.48, 86.71] | 10 |

Table 2: Recovery

| CellType | Condition | Mean  | 95% CI         | n  |
|----------|-----------|-------|----------------|----|
| CD3      | DT        | 60.03 | [49.51, 70.56] | 10 |
| CD3      | Mix       | 68.03 | [56.43, 79.64] | 10 |
| CD3      | 10D       | 52.56 | [43.35, 61.76] | 10 |
| CD14     | DT        | 72.89 | [62.97, 82.82] | 10 |
| CD14     | Mix       | 67.54 | [57.81, 77.27] | 10 |
| CD14     | 10D       | 67.94 | [59.38, 76.49] | 10 |

Table 3: Viability effect size (percent difference from 10% DMSO)

| CellType | Condition | Mean   | 95% CI         | n  |
|----------|-----------|--------|----------------|----|
| CD3      | DT        | 6.053  | [1.95, 10.16]  | 10 |
| CD3      | Mix       | 11.383 | [7.87, 14.9]   | 10 |
| CD14     | DT        | 3.317  | [-0.33, 6.96]  | 10 |
| CD14     | Mix       | -1.862 | [-3.35, -0.37] | 10 |

Table 4: Recovery effect size (percent difference from 10% DMSO)

| CellType | Condition | Mean    | 95% CI         | n  |
|----------|-----------|---------|----------------|----|
| CD3      | DT        | 7.4752  | [2.04, 12.91]  | 10 |
| CD3      | Mix       | 15.4770 | [8.78, 22.17]  | 10 |
| CD14     | DT        | 4.9578  | [-0.18, 10.09] | 10 |
| CD14     | Mix       | -0.3973 | [-5.42, 4.62]  | 10 |

## Repeated measures ANOVAs with Tukey post-test (parametric, paired)

Table 5: CD3 viability, repeated measures ANOVA with Tukey post-test

| Comparisons | Estimate | Std. Error | Z value | p        |
|-------------|----------|------------|---------|----------|
| 10D - DT    | -6.05    | 1.5        | -4.04   | 1.45e-04 |
| 10D - Mix   | -11.38   | 1.5        | -7.6    | 6.48e-14 |
| Mix - DT    | 5.33     | 1.5        | 3.56    | 1.04e-03 |

Table 6: CD14 viability, repeated measures ANOVA with Tukey post-test

| Comparisons | Estimate | Std. Error | Z value | p        |
|-------------|----------|------------|---------|----------|
| 10D - DT    | -3.32    | 1.33       | -2.5    | 0.03     |
| 10D - Mix   | 1.86     | 1.33       | 1.4     | 0.34     |
| Mix - DT    | -5.18    | 1.33       | -3.9    | 2.71e-04 |

Table 7: CD3 recovery, repeated measures ANOVA with Tukey post-test

| Comparisons | Estimate | Std. Error | Z value | p        |
|-------------|----------|------------|---------|----------|
| 10D - DT    | -7.48    | 2.45       | -3.05   | 6.56e-03 |
| 10D - Mix   | -15.48   | 2.45       | -6.31   | 6.86e-10 |
| Mix - DT    | 8        | 2.45       | 3.26    | 3.16e-03 |

Table 8: CD14 recovery, repeated measures ANOVA with Tukey post-test

| Comparisons | Estimate | Std. Error | Z value | p    |
|-------------|----------|------------|---------|------|
| 10D - DT    | -4.96    | 2.21       | -2.24   | 0.06 |
| 10D - Mix   | 0.4      | 2.21       | 0.18    | 0.98 |
| Mix - DT    | -5.36    | 2.21       | -2.42   | 0.04 |

## Correlations

Table 9: Recovery as a function of viability

| CellType | Condition | AdjustedR <sup>2</sup> | Coef    | p    |
|----------|-----------|------------------------|---------|------|
| CD3      | DT        | 0.388086               | 1.4240  | 0.03 |
| CD3      | Mix       | 0.336378               | 1.5490  | 0.05 |
| CD3      | 10D       | 0.369375               | 0.9704  | 0.04 |
| CD14     | DT        | 0.001662               | -0.7512 | 0.34 |
| CD14     | Mix       | -0.101937              | -0.1876 | 0.69 |
| CD14     | 10D       | -0.074027              | -0.2389 | 0.55 |

## Comparison with published cryopreservation methods

Table 10: Comparison of cryopreservation procedures. Effect size relative to procedure B, paired t-test

| CellType | Condition | Mean    | 95% CI         | p    | n |
|----------|-----------|---------|----------------|------|---|
| CD3      | Proc A    | -2.4397 | [-12.32, 7.44] | 0.49 | 4 |
| CD14     | Proc A    | 0.7515  | [-8.28, 9.79]  | 0.81 | 4 |

Table 11: Comparison of 1.2% trehalose and 6% HES. Effect size relative to trehalose, paired t-test

| CellType | Condition | Mean  | 95% CI        | p        | n |
|----------|-----------|-------|---------------|----------|---|
| CD3      | HES       | 8.657 | [3.24, 14.07] | 0.01     | 4 |
| CD14     | HES       | 7.760 | [3.61, 11.91] | 9.47e-03 | 4 |

## Comparison with published methods: Viability and recovery

Table 12: Absolute viability

| CellType | Condition | Mean  | 95% CI         | n |
|----------|-----------|-------|----------------|---|
| CD3      | GHRC I    | 78.88 | [72.18, 85.57] | 6 |
| CD3      | GHRC II   | 77.56 | [70.55, 84.57] | 6 |
| CD3      | HANC      | 75.52 | [68.53, 82.5]  | 6 |
| CD3      | Seattle   | 78.72 | [70.56, 86.87] | 6 |
| CD14     | GHRC I    | 82.41 | [73.56, 91.25] | 6 |
| CD14     | GHRC II   | 81.81 | [72.36, 91.25] | 6 |
| CD14     | HANC      | 78.41 | [67.72, 89.1]  | 6 |
| CD14     | Seattle   | 84.58 | [75.27, 93.89] | 6 |

Table 13: Recovery

| CellType | Condition | Mean  | 95% CI         | n |
|----------|-----------|-------|----------------|---|
| CD3      | GHRC I    | 77.48 | [69.96, 85]    | 6 |
| CD3      | GHRC II   | 80.40 | [73.64, 87.15] | 6 |
| CD3      | HANC      | 67.42 | [60.9, 73.94]  | 6 |
| CD3      | Seattle   | 80.31 | [75.74, 84.88] | 6 |
| CD14     | GHRC I    | 73.32 | [63.35, 83.29] | 6 |
| CD14     | GHRC II   | 77.21 | [69.43, 85]    | 6 |
| CD14     | HANC      | 59.74 | [51.01, 68.48] | 6 |
| CD14     | Seattle   | 75.99 | [67.5, 84.48]  | 6 |

## Comparison with published methods: Repeated measures ANOVA with Tukey post-test

Table 14: CD3 viability, repeated measures ANOVA with Tukey post-test

| Comparisons       | Estimate | Std. Error | Z value | p        |
|-------------------|----------|------------|---------|----------|
| GHRC II - GHRC I  | -1.32    | 0.77       | -1.72   | 0.32     |
| HANC - GHRC I     | -3.36    | 0.77       | -4.38   | 8.18e-05 |
| HANC - GHRC II    | -2.04    | 0.77       | -2.66   | 0.04     |
| Seattle - GHRC I  | -0.16    | 0.77       | -0.21   | 1        |
| Seattle - GHRC II | 1.16     | 0.77       | 1.51    | 0.43     |
| Seattle - HANC    | 3.2      | 0.77       | 4.17    | 1.90e-04 |

Table 15: CD14 viability, repeated measures ANOVA with Tukey post-test

| Comparisons       | Estimate | Std. Error | Z value | p    |
|-------------------|----------|------------|---------|------|
| GHRC II - GHRC I  | -0.6     | 2.15       | -0.28   | 0.99 |
| HANC - GHRC I     | -4       | 2.15       | -1.86   | 0.25 |
| HANC - GHRC II    | -3.4     | 2.15       | -1.58   | 0.39 |
| Seattle - GHRC I  | 2.18     | 2.15       | 1.01    | 0.74 |
| Seattle - GHRC II | 2.77     | 2.15       | 1.29    | 0.57 |
| Seattle - HANC    | 6.18     | 2.15       | 2.87    | 0.02 |

Table 16: CD3 recovery, repeated measures ANOVA with Tukey post-test

| Comparisons       | Estimate | Std. Error | Z value | p        |
|-------------------|----------|------------|---------|----------|
| GHRC II - GHRC I  | 2.92     | 2.41       | 1.21    | 0.62     |
| HANC - GHRC I     | -10.06   | 2.41       | -4.18   | 1.48e-04 |
| HANC - GHRC II    | -12.98   | 2.41       | -5.4    | 3.58e-07 |
| Seattle - GHRC I  | 2.83     | 2.41       | 1.18    | 0.64     |
| Seattle - GHRC II | -0.09    | 2.41       | -0.04   | 1        |
| Seattle - HANC    | 12.89    | 2.41       | 5.36    | 3.28e-06 |

Table 17: CD14 recovery, repeated measures ANOVA with Tukey post-test

| Comparisons       | Estimate | Std. Error | Z value | p        |
|-------------------|----------|------------|---------|----------|
| GHRC II - GHRC I  | 3.9      | 2.48       | 1.57    | 0.39     |
| HANC - GHRC I     | -13.57   | 2.48       | -5.48   | 1.43e-07 |
| HANC - GHRC II    | -17.47   | 2.48       | -7.05   | 5.10e-12 |
| Seattle - GHRC I  | 2.67     | 2.48       | 1.08    | 0.7      |
| Seattle - GHRC II | -1.22    | 2.48       | -0.49   | 0.96     |
| Seattle - HANC    | 16.25    | 2.48       | 6.56    | 9.86e-10 |

Table 18: Comparison of cryopreservation in FBS or 12.5% BSA in RPMI, both with 6% DMSO, 5% EG, and 6% HES. Effect size relative to FBS, paired t-test

| CellType | Condition | Mean   | 95% CI          | p    | n |
|----------|-----------|--------|-----------------|------|---|
| CD3      | BSA-RPMI  | -2.039 | [-7.21, 3.13]   | 0.39 | 9 |
| CD14     | BSA-RPMI  | -5.935 | [-10.89, -0.98] | 0.02 | 9 |

# Optimal processing

## Which steps matter?

Table 19: Absolute viability

| CellType | Condition     | Mean  | 95% CI         | n |
|----------|---------------|-------|----------------|---|
| CD3      | HANC          | 71.42 | [67.19, 75.65] | 5 |
| CD3      | Slow addition | 70.19 | [66.56, 73.82] | 5 |
| CD3      | No benzonase  | 70.74 | [66.27, 75.21] | 5 |
| CD3      | 15 mL tube    | 70.70 | [67.21, 74.19] | 5 |
| CD3      | 1 wash        | 68.25 | [62.5, 74]     | 5 |
| CD14     | HANC          | 86.26 | [78.33, 94.19] | 5 |
| CD14     | Slow addition | 85.99 | [77.28, 94.7]  | 5 |
| CD14     | No benzonase  | 85.76 | [77.74, 93.78] | 5 |
| CD14     | 15 mL tube    | 83.94 | [75.15, 92.73] | 5 |
| CD14     | 1 wash        | 82.60 | [74.35, 90.85] | 5 |

Table 20: Average recovery

| CellType | Condition     | Mean  | 95% CI         | n |
|----------|---------------|-------|----------------|---|
| CD3      | HANC          | 60.14 | [43.06, 77.22] | 5 |
| CD3      | Slow addition | 61.05 | [47.04, 75.06] | 5 |
| CD3      | No benzonase  | 62.19 | [48.95, 75.42] | 5 |
| CD3      | 15 mL tube    | 62.45 | [46.69, 78.2]  | 5 |
| CD3      | 1 wash        | 68.22 | [55.98, 80.45] | 5 |
| CD14     | HANC          | 50.08 | [30.47, 69.69] | 5 |
| CD14     | Slow addition | 50.98 | [29.35, 72.6]  | 5 |
| CD14     | No benzonase  | 51.87 | [33.93, 69.81] | 5 |
| CD14     | 15 mL tube    | 56.84 | [36.69, 76.99] | 5 |
| CD14     | 1 wash        | 58.14 | [45.81, 70.48] | 5 |

Table 21: Viability relative to HANC

| CellType | Condition     | Mean    | 95% CI         | n |
|----------|---------------|---------|----------------|---|
| CD3      | Slow addition | -1.6268 | [-3.1, -0.15]  | 5 |
| CD3      | No benzonase  | -0.8892 | [-3.59, 1.81]  | 5 |
| CD3      | 15 mL tube    | -0.8521 | [-6.35, 4.64]  | 5 |
| CD3      | 1 wash        | -4.2081 | [-7.58, -0.84] | 5 |
| CD14     | Slow addition | -0.2848 | [-2.67, 2.1]   | 5 |
| CD14     | No benzonase  | -0.5654 | [-3.5, 2.37]   | 5 |
| CD14     | 15 mL tube    | -2.4807 | [-4.82, -0.14] | 5 |
| CD14     | 1 wash        | -3.8997 | [-9.56, 1.76]  | 5 |

Table 22: Recovery relative to HANC

| CellType | Condition     | Mean   | 95% CI         | n |
|----------|---------------|--------|----------------|---|
| CD3      | Slow addition | 0.9059 | [-3.77, 5.58]  | 5 |
| CD3      | No benzonase  | 2.0426 | [-2.6, 6.69]   | 5 |
| CD3      | 15 mL tube    | 2.3026 | [-3.59, 8.19]  | 5 |
| CD3      | 1 wash        | 8.0725 | [0.53, 15.62]  | 5 |
| CD14     | Slow addition | 0.8960 | [-5.68, 7.47]  | 5 |
| CD14     | No benzonase  | 1.7912 | [-3.02, 6.6]   | 5 |
| CD14     | 15 mL tube    | 6.7582 | [-0.8, 14.31]  | 5 |
| CD14     | 1 wash        | 8.0639 | [-0.67, 16.79] | 5 |

Table 23: CD3 viability, repeated measures ANOVA with Tukey post-test

| Comparisons                  | Estimate | Std. Error | Z value | p    |
|------------------------------|----------|------------|---------|------|
| 1 wash - 15 mL tube          | -2.45    | 1.22       | -2      | 0.26 |
| 1 wash - HANC                | -3.17    | 1.22       | -2.59   | 0.07 |
| 1 wash - No benzonase        | -2.49    | 1.22       | -2.04   | 0.25 |
| 1 wash - Slow addition       | -1.94    | 1.22       | -1.59   | 0.51 |
| 15 mL tube - HANC            | -0.72    | 1.22       | -0.59   | 0.98 |
| 15 mL tube - No benzonase    | -0.04    | 1.22       | -0.03   | 1    |
| 15 mL tube - Slow addition   | 0.51     | 1.22       | 0.42    | 0.99 |
| No benzonase - HANC          | -0.68    | 1.22       | -0.56   | 0.98 |
| No benzonase - Slow addition | 0.55     | 1.22       | 0.45    | 0.99 |
| Slow addition - HANC         | -1.23    | 1.22       | -1.01   | 0.85 |

Table 24: CD14 viability, repeated measures ANOVA with Tukey post-test

| Comparisons                  | Estimate | Std. Error | Z value | p    |
|------------------------------|----------|------------|---------|------|
| 1 wash - 15 mL tube          | -1.34    | 1.58       | -0.85   | 0.91 |
| 1 wash - HANC                | -3.66    | 1.58       | -2.32   | 0.14 |
| 1 wash - No benzonase        | -3.16    | 1.58       | -2.01   | 0.26 |
| 1 wash - Slow addition       | -3.39    | 1.58       | -2.15   | 0.2  |
| 15 mL tube - HANC            | -2.32    | 1.58       | -1.47   | 0.58 |
| 15 mL tube - No benzonase    | -1.82    | 1.58       | -1.16   | 0.78 |
| 15 mL tube - Slow addition   | -2.05    | 1.58       | -1.3    | 0.69 |
| No benzonase - HANC          | -0.5     | 1.58       | -0.32   | 1    |
| No benzonase - Slow addition | -0.23    | 1.58       | -0.15   | 1    |
| Slow addition - HANC         | -0.27    | 1.58       | -0.17   | 1    |



Table 25: CD3 recovery, repeated measures ANOVA with Tukey post-test

| Comparisons                  | Estimate | Std. Error | Z value | p        |
|------------------------------|----------|------------|---------|----------|
| 1 wash - 15 mL tube          | 5.77     | 2.15       | 2.69    | 0.06     |
| 1 wash - HANC                | 8.07     | 2.15       | 3.76    | 1.66e-03 |
| 1 wash - No benzonase        | 6.03     | 2.15       | 2.81    | 0.04     |
| 1 wash - Slow addition       | 7.17     | 2.15       | 3.34    | 7.57e-03 |
| 15 mL tube - HANC            | 2.3      | 2.15       | 1.07    | 0.82     |
| 15 mL tube - No benzonase    | 0.26     | 2.15       | 0.12    | 1        |
| 15 mL tube - Slow addition   | 1.4      | 2.15       | 0.65    | 0.97     |
| No benzonase - HANC          | 2.04     | 2.15       | 0.95    | 0.88     |
| No benzonase - Slow addition | 1.14     | 2.15       | 0.53    | 0.98     |
| Slow addition - HANC         | 0.91     | 2.15       | 0.42    | 0.99     |

Table 26: CD14 recovery, repeated measures ANOVA with Tukey post-test

| Comparisons                  | Estimate | Std. Error | Z value | p    |
|------------------------------|----------|------------|---------|------|
| 1 wash - 15 mL tube          | 1.31     | 2.99       | 0.44    | 0.99 |
| 1 wash - HANC                | 8.06     | 2.99       | 2.69    | 0.05 |
| 1 wash - No benzonase        | 6.27     | 2.99       | 2.1     | 0.22 |
| 1 wash - Slow addition       | 7.17     | 2.99       | 2.4     | 0.12 |
| 15 mL tube - HANC            | 6.76     | 2.99       | 2.26    | 0.16 |
| 15 mL tube - No benzonase    | 4.97     | 2.99       | 1.66    | 0.46 |
| 15 mL tube - Slow addition   | 5.86     | 2.99       | 1.96    | 0.29 |
| No benzonase - HANC          | 1.79     | 2.99       | 0.6     | 0.98 |
| No benzonase - Slow addition | 0.9      | 2.99       | 0.3     | 1    |
| Slow addition - HANC         | 0.9      | 2.99       | 0.3     | 1    |

## HANC rescue: viability, recovery, and effect sizes

Table 27: Absolute viability

| CellType | Condition | Mean  | 95% CI         | n |
|----------|-----------|-------|----------------|---|
| CD3      | Frau I    | 72.43 | [67.58, 77.29] | 6 |
| CD3      | Frau II   | 71.64 | [67.53, 75.75] | 6 |
| CD3      | HANC      | 67.57 | [62.51, 72.62] | 6 |
| CD3      | Opt HANC  | 70.67 | [67.13, 74.22] | 6 |
| CD3      | Seattle   | 72.84 | [69.83, 75.85] | 6 |
| CD14     | Frau I    | 84.81 | [79.68, 89.94] | 6 |
| CD14     | Frau II   | 84.01 | [78.68, 89.34] | 6 |
| CD14     | HANC      | 79.88 | [75.67, 84.08] | 6 |
| CD14     | Opt HANC  | 81.49 | [77.19, 85.79] | 6 |
| CD14     | Seattle   | 84.88 | [79.67, 90.1]  | 6 |

Table 28: Average recovery

| CellType | Condition | Mean  | 95% CI         | n |
|----------|-----------|-------|----------------|---|
| CD3      | Frau I    | 69.13 | [58.28, 79.99] | 6 |
| CD3      | Frau II   | 65.67 | [53.44, 77.89] | 6 |
| CD3      | HANC      | 50.66 | [40.17, 61.16] | 6 |
| CD3      | Opt HANC  | 64.01 | [54.07, 73.95] | 6 |
| CD3      | Seattle   | 68.85 | [62.87, 74.83] | 6 |
| CD14     | Frau I    | 72.40 | [62.84, 81.97] | 6 |
| CD14     | Frau II   | 69.88 | [60.92, 78.84] | 6 |
| CD14     | HANC      | 46.25 | [37.63, 54.88] | 6 |
| CD14     | Opt HANC  | 68.85 | [59.67, 78.03] | 6 |
| CD14     | Seattle   | 74.42 | [66.91, 81.94] | 6 |

Table 29: Viability relative to HANC

| CellType | Condition | Mean  | 95% CI        | n |
|----------|-----------|-------|---------------|---|
| CD3      | Frau I    | 7.644 | [2.86, 12.43] | 6 |
| CD3      | Frau II   | 5.337 | [2.14, 8.53]  | 6 |
| CD3      | HANC      | 0.000 | [0, 0]        | 6 |
| CD3      | Opt HANC  | 3.933 | [1.48, 6.38]  | 6 |
| CD3      | Seattle   | 6.635 | [2.23, 11.04] | 6 |
| CD14     | Frau I    | 8.456 | [6.35, 10.56] | 6 |
| CD14     | Frau II   | 8.500 | [4.96, 12.04] | 6 |
| CD14     | HANC      | 0.000 | [0, 0]        | 6 |
| CD14     | Opt HANC  | 1.763 | [-0.43, 3.96] | 6 |
| CD14     | Seattle   | 5.435 | [3.47, 7.4]   | 6 |

Table 30: Recovery relative to HANC

| CellType | Condition | Mean  | 95% CI         | n |
|----------|-----------|-------|----------------|---|
| CD3      | Frau I    | 18.47 | [6.37, 30.57]  | 6 |
| CD3      | Frau II   | 15.00 | [5.16, 24.84]  | 6 |
| CD3      | HANC      | 0.00  | [0, 0]         | 6 |
| CD3      | Opt HANC  | 13.34 | [6.49, 20.2]   | 6 |
| CD3      | Seattle   | 18.18 | [8.84, 27.53]  | 6 |
| CD14     | Frau I    | 26.15 | [10.94, 41.36] | 6 |
| CD14     | Frau II   | 23.63 | [13.14, 34.11] | 6 |
| CD14     | HANC      | 0.00  | [0, 0]         | 6 |
| CD14     | Opt HANC  | 22.60 | [12.74, 32.46] | 6 |
| CD14     | Seattle   | 28.17 | [15.88, 40.46] | 6 |

Table 31: CD3 viability, repeated measures ANOVA with Tukey post-test

| Comparisons        | Estimate | Std. Error | Z value | p        |
|--------------------|----------|------------|---------|----------|
| Frau II - Frau I   | -0.79    | 1.01       | -0.79   | 0.93     |
| HANC - Frau I      | -4.87    | 1.01       | -4.84   | 1.03e-05 |
| HANC - Frau II     | -4.07    | 1.01       | -4.05   | 5.37e-04 |
| Opt HANC - Frau I  | -1.76    | 1.01       | -1.75   | 0.4      |
| Opt HANC - Frau II | -0.97    | 1.01       | -0.96   | 0.87     |
| Opt HANC - HANC    | 3.11     | 1.01       | 3.09    | 0.02     |
| Seattle - Frau I   | 0.41     | 1.01       | 0.41    | 0.99     |
| Seattle - Frau II  | 1.2      | 1.01       | 1.19    | 0.76     |
| Seattle - HANC     | 5.27     | 1.01       | 5.25    | 1.14e-06 |
| Seattle - Opt HANC | 2.17     | 1.01       | 2.16    | 0.2      |

Table 32: CD14 viability, repeated measures ANOVA with Tukey post-test

| Comparisons        | Estimate | Std. Error | Z value | p        |
|--------------------|----------|------------|---------|----------|
| Frau II - Frau I   | -0.8     | 0.92       | -0.87   | 0.91     |
| HANC - Frau I      | -4.93    | 0.92       | -5.37   | 5.82e-07 |
| HANC - Frau II     | -4.13    | 0.92       | -4.5    | 7.75e-05 |
| Opt HANC - Frau I  | -3.32    | 0.92       | -3.61   | 2.82e-03 |
| Opt HANC - Frau II | -2.52    | 0.92       | -2.74   | 0.05     |
| Opt HANC - HANC    | 1.62     | 0.92       | 1.76    | 0.4      |
| Seattle - Frau I   | 0.07     | 0.92       | 0.08    | 1        |
| Seattle - Frau II  | 0.87     | 0.92       | 0.95    | 0.88     |
| Seattle - HANC     | 5.01     | 0.92       | 5.45    | 3.92e-07 |
| Seattle - Opt HANC | 3.39     | 0.92       | 3.69    | 2.12e-03 |

Table 33: CD3 recovery, repeated measures ANOVA with Tukey post-test

| Comparisons        | Estimate | Std. Error | Z value | p        |
|--------------------|----------|------------|---------|----------|
| Frau II - Frau I   | -3.47    | 3.32       | -1.05   | 0.83     |
| HANC - Frau I      | -18.47   | 3.32       | -5.57   | 2.52e-07 |
| HANC - Frau II     | -15      | 3.32       | -4.52   | 5.53e-05 |
| Opt HANC - Frau I  | -5.13    | 3.32       | -1.55   | 0.53     |
| Opt HANC - Frau II | -1.66    | 3.32       | -0.5    | 0.99     |
| Opt HANC - HANC    | 13.34    | 3.32       | 4.02    | 5.42e-04 |
| Seattle - Frau I   | -0.29    | 3.32       | -0.09   | 1        |
| Seattle - Frau II  | 3.18     | 3.32       | 0.96    | 0.87     |
| Seattle - HANC     | 18.18    | 3.32       | 5.48    | 4.37e-07 |
| Seattle - Opt HANC | 4.84     | 3.32       | 1.46    | 0.59     |

Table 34: CD14 recovery, repeated measures ANOVA with Tukey post-test

| Comparisons        | Estimate | Std. Error | Z value | p        |
|--------------------|----------|------------|---------|----------|
| Frau II - Frau I   | -2.52    | 3.82       | -0.66   | 0.96     |
| HANC - Frau I      | -26.15   | 3.82       | -6.85   | 2.78e-11 |
| HANC - Frau II     | -23.63   | 3.82       | -6.19   | 3.11e-09 |
| Opt HANC - Frau I  | -3.55    | 3.82       | -0.93   | 0.89     |
| Opt HANC - Frau II | -1.03    | 3.82       | -0.27   | 1        |
| Opt HANC - HANC    | 22.6     | 3.82       | 5.92    | 1.91e-08 |
| Seattle - Frau I   | 2.02     | 3.82       | 0.53    | 0.98     |
| Seattle - Frau II  | 4.54     | 3.82       | 1.19    | 0.76     |
| Seattle - HANC     | 28.17    | 3.82       | 7.38    | 7.33e-13 |
| Seattle - Opt HANC | 5.57     | 3.82       | 1.46    | 0.59     |

Table 35: Percent of scatter gated events that are live CD45+

| CellType | Condition | Mean  | 95% CI         | n  |
|----------|-----------|-------|----------------|----|
| CD45     | Fresh     | 10.32 | [8.61, 12.03]  | 24 |
| CD45     | Frozen    | 15.59 | [12.75, 18.42] | 24 |

Table 36: Percent of scatter gated events that are live CD45+. Difference in percentage from fresh, paired t-test

| CellType | Condition | Mean  | 95% CI       | p        | n  |
|----------|-----------|-------|--------------|----------|----|
| CD45     | Frozen    | 5.262 | [3.68, 6.84] | 5.09e-07 | 24 |

## Cryopreservation of endocervical cytobrushes

Table 37: Average recovery

| CellType | Condition | Mean  | 95% CI         | n  |
|----------|-----------|-------|----------------|----|
| CD3      | Cocktail  | 60.87 | [37.81, 83.94] | 13 |
| CD3      | DMSO      | 53.31 | [37.65, 68.96] | 13 |
| CD14     | Cocktail  | 66.22 | [41.65, 90.8]  | 13 |
| CD14     | DMSO      | 67.74 | [39.2, 96.28]  | 13 |
| CD66b    | Cocktail  | 31.20 | [19.7, 42.7]   | 13 |
| CD66b    | DMSO      | 36.15 | [11.48, 60.81] | 13 |

Table 38: Effect size relative to 10% DMSO, paired t-test

| CellType | Condition | Mean   | 95% CI          | p    | n  |
|----------|-----------|--------|-----------------|------|----|
| CD3      | Cocktail  | 7.564  | [-6.11, 21.24]  | 0.25 | 13 |
| CD14     | Cocktail  | -1.514 | [-10.92, 7.9]   | 0.73 | 13 |
| CD66b    | Cocktail  | -4.947 | [-29.24, 19.34] | 0.67 | 13 |

Table 39: Number of live cells (log10, if whole sample had been treated this way)

| CellType | Condition | Mean  | 95% CI       | n  |
|----------|-----------|-------|--------------|----|
| CD14     | Cocktail  | 3.945 | [3.61, 4.29] | 13 |
| CD14     | DMSO      | 3.977 | [3.68, 4.28] | 13 |
| CD3      | Cocktail  | 3.657 | [3.32, 4]    | 13 |
| CD3      | DMSO      | 3.635 | [3.34, 3.93] | 13 |
| CD66b    | Cocktail  | 5.261 | [4.95, 5.58] | 13 |
| CD66b    | DMSO      | 5.260 | [4.95, 5.57] | 13 |

## Cryopreservation of whole cytobrushes

Table 40: Number of live cells (log10)

| CellType | Condition      | Mean  | 95% CI       | n |
|----------|----------------|-------|--------------|---|
| CD3      | Isolated cells | 3.084 | [2.04, 4.13] | 6 |
| CD3      | Whole brush    | 3.273 | [2.53, 4.01] | 6 |
| CD14     | Isolated cells | 2.919 | [2.09, 3.75] | 6 |
| CD14     | Whole brush    | 2.983 | [2.15, 3.82] | 6 |
| CD66b    | Isolated cells | 3.928 | [3.09, 4.77] | 6 |
| CD66b    | Whole brush    | 4.084 | [3.2, 4.97]  | 6 |

Table 41: Difference in cell numbers (log10) relative to isolated cells, paired t-test

| CellType | Condition   | Mean    | 95% CI        | p    | n |
|----------|-------------|---------|---------------|------|---|
| CD3      | Whole brush | 0.18909 | [-0.28, 0.66] | 0.35 | 6 |
| CD14     | Whole brush | 0.06437 | [-0.73, 0.86] | 0.84 | 6 |
| CD66b    | Whole brush | 0.15621 | [-0.79, 1.11] | 0.69 | 6 |

Table 42: Viability

| CellType | Condition      | Mean  | 95% CI         | n |
|----------|----------------|-------|----------------|---|
| CD3      | Isolated cells | 68.48 | [53.9, 83.07]  | 6 |
| CD3      | Whole brush    | 68.28 | [51.95, 84.61] | 6 |
| CD14     | Isolated cells | 75.27 | [59.72, 90.82] | 6 |
| CD14     | Whole brush    | 60.05 | [40.36, 79.74] | 6 |
| CD66b    | Isolated cells | 60.27 | [42.63, 77.92] | 6 |
| CD66b    | Whole brush    | 39.68 | [12.23, 67.14] | 6 |

Table 43: Absolute viability relative to isolated cells, paired t-test

| CellType | Condition   | Mean     | 95% CI         | p    | n |
|----------|-------------|----------|----------------|------|---|
| CD3      | Whole brush | -0.2042  | [-5.92, 5.51]  | 0.93 | 6 |
| CD14     | Whole brush | -15.2208 | [-32.97, 2.53] | 0.08 | 6 |
| CD66b    | Whole brush | -20.5915 | [-47.58, 6.4]  | 0.11 | 6 |

# Cryopreservation of colorectal immune cells

Table 44: Average recovery

| CellType | Condition            | Mean  | 95% CI         | n |
|----------|----------------------|-------|----------------|---|
| CD3      | 6% DMSO 5% EG 6% HES | 43.61 | [26.08, 61.15] | 4 |
| CD3      | GHRC I               | 52.64 | [33.2, 72.08]  | 4 |
| CD3      | GHRC II              | 52.93 | [35.07, 70.79] | 4 |
| CD3      | HANC                 | 56.71 | [40, 73.43]    | 4 |
| CD3      | Optimal HANC         | 54.88 | [34.46, 75.3]  | 4 |
| CD8      | 6% DMSO 5% EG 6% HES | 41.80 | [27.09, 56.51] | 4 |
| CD8      | GHRC I               | 52.32 | [35.3, 69.35]  | 4 |
| CD8      | GHRC II              | 50.77 | [37.4, 64.13]  | 4 |
| CD8      | HANC                 | 57.50 | [43.09, 71.91] | 4 |
| CD8      | Optimal HANC         | 55.10 | [36.96, 73.24] | 4 |
| CD13     | 6% DMSO 5% EG 6% HES | 38.73 | [3.92, 73.54]  | 4 |
| CD13     | GHRC I               | 47.11 | [2.09, 92.13]  | 4 |
| CD13     | GHRC II              | 44.98 | [2.1, 87.86]   | 4 |
| CD13     | HANC                 | 46.78 | [5.5, 88.05]   | 4 |
| CD13     | Optimal HANC         | 48.15 | [-0.55, 96.85] | 4 |
| CD33     | 6% DMSO 5% EG 6% HES | 24.19 | [16.58, 31.8]  | 4 |
| CD33     | GHRC I               | 30.90 | [21.61, 40.2]  | 4 |
| CD33     | GHRC II              | 28.28 | [20.21, 36.35] | 4 |
| CD33     | HANC                 | 34.55 | [24.68, 44.41] | 4 |
| CD33     | Optimal HANC         | 33.59 | [19.28, 47.89] | 4 |
| CD206    | 6% DMSO 5% EG 6% HES | 30.63 | [15.14, 46.12] | 4 |
| CD206    | GHRC I               | 41.72 | [19.97, 63.48] | 4 |
| CD206    | GHRC II              | 35.35 | [15.44, 55.27] | 4 |
| CD206    | HANC                 | 43.83 | [17.17, 70.49] | 4 |
| CD206    | Optimal HANC         | 44.18 | [12.71, 75.65] | 4 |
| CD66b    | 6% DMSO 5% EG 6% HES | 14.12 | [2.93, 25.32]  | 4 |
| CD66b    | GHRC I               | 16.75 | [8.67, 24.84]  | 4 |
| CD66b    | GHRC II              | 16.36 | [5.51, 27.21]  | 4 |
| CD66b    | HANC                 | 18.28 | [7.3, 29.25]   | 4 |
| CD66b    | Optimal HANC         | 17.39 | [6.67, 28.11]  | 4 |

Table 45: CD3 recovery, repeated measures ANOVA with Tukey post-test

| Comparisons                         | Estimate | Std. Error | Z value | p        |
|-------------------------------------|----------|------------|---------|----------|
| GHRC I - 6% DMSO 5% EG 6% HES       | 9.03     | 1.62       | 5.58    | 6.76e-07 |
| GHRC II - 6% DMSO 5% EG 6% HES      | 9.32     | 1.62       | 5.77    | 8.93e-08 |
| GHRC II - GHRC I                    | 0.29     | 1.62       | 0.18    | 1        |
| HANC - 6% DMSO 5% EG 6% HES         | 13.1     | 1.62       | 8.1     | 3.89e-15 |
| HANC - GHRC I                       | 4.07     | 1.62       | 2.52    | 0.09     |
| HANC - GHRC II                      | 3.78     | 1.62       | 2.34    | 0.13     |
| Optimal HANC - 6% DMSO 5% EG 6% HES | 11.27    | 1.62       | 6.97    | 1.38e-11 |
| Optimal HANC - GHRC I               | 2.24     | 1.62       | 1.39    | 0.64     |
| Optimal HANC - GHRC II              | 1.95     | 1.62       | 1.2     | 0.75     |
| Optimal HANC - HANC                 | -1.83    | 1.62       | -1.13   | 0.79     |

Table 46: CD13 recovery, repeated measures ANOVA with Tukey post-test

| Comparisons                         | Estimate | Std. Error | Z value | p        |
|-------------------------------------|----------|------------|---------|----------|
| GHRC I - 6% DMSO 5% EG 6% HES       | 8.39     | 2.7        | 3.1     | 0.02     |
| GHRC II - 6% DMSO 5% EG 6% HES      | 6.26     | 2.7        | 2.31    | 0.14     |
| GHRC II - GHRC I                    | -2.13    | 2.7        | -0.79   | 0.93     |
| HANC - 6% DMSO 5% EG 6% HES         | 8.05     | 2.7        | 2.98    | 0.02     |
| HANC - GHRC I                       | -0.34    | 2.7        | -0.12   | 1        |
| HANC - GHRC II                      | 1.79     | 2.7        | 0.66    | 0.96     |
| Optimal HANC - 6% DMSO 5% EG 6% HES | 9.42     | 2.7        | 3.49    | 4.47e-03 |
| Optimal HANC - GHRC I               | 1.04     | 2.7        | 0.38    | 1        |
| Optimal HANC - GHRC II              | 3.17     | 2.7        | 1.17    | 0.77     |
| Optimal HANC - HANC                 | 1.37     | 2.7        | 0.51    | 0.99     |

Table 47: Change in cytokine production relative to fresh, paired t-test

| Stim     | Cytokine | Mean    | 95% CI         | p        | n |
|----------|----------|---------|----------------|----------|---|
| CEF      | Any      | 1.1467  | [-1.6, 3.9]    | 0.214747 | 3 |
| CEF      | CD107a   | 0.8233  | [-2.4, 4.05]   | 0.386602 | 3 |
| CEF      | IFNg     | 0.7967  | [-2.48, 4.08]  | 0.405500 | 3 |
| CEF      | IL2      | 0.5867  | [-2.07, 3.24]  | 0.441986 | 3 |
| CEF      | MIP      | 1.0533  | [-3.35, 5.46]  | 0.411585 | 3 |
| CEF      | TNFa     | 1.0300  | [-2.5, 4.56]   | 0.335880 | 3 |
| PMA/Iono | Any      | 8.0440  | [-4.94, 21.03] | 0.160655 | 5 |
| PMA/Iono | CD107a   | -0.5420 | [-17.5, 16.41] | 0.933551 | 5 |
| PMA/Iono | IFNg     | 18.0100 | [2.02, 34]     | 0.035260 | 5 |
| PMA/Iono | IL2      | 24.5680 | [10.82, 38.31] | 0.007694 | 5 |
| PMA/Iono | MIP      | 13.7760 | [-7.91, 35.46] | 0.152555 | 5 |
| PMA/Iono | TNFa     | 19.9940 | [6.02, 33.97]  | 0.016502 | 5 |
| SEB      | Any      | 2.6720  | [-5.95, 11.3]  | 0.438250 | 5 |
| SEB      | CD107a   | 1.0300  | [-7.29, 9.35]  | 0.748493 | 5 |
| SEB      | IFNg     | 2.4580  | [-3.94, 8.86]  | 0.346324 | 5 |
| SEB      | IL2      | 2.8660  | [-1.12, 6.85]  | 0.116320 | 5 |
| SEB      | MIP      | 3.0280  | [-6.81, 12.86] | 0.440833 | 5 |
| SEB      | TNFa     | 4.9860  | [1.15, 8.82]   | 0.022525 | 5 |
